# Supplementary material for: Impact of nanoparticle surface modification on the mechanical properties of polystyrene-based nanocomposites
Source: Royal Society of Chemistry journal article supplement (doi:10.1039/c8ra00052b), 2018-01-01
Supplement: c8ra00052b1.pdf [file c8ra00052b1.pdf]

## Supplementary Information

### Impact of nanoparticle surface modification on the mechanical properties of polystyrene-based nanocomposites

A. Kockmann,<sup>a</sup> J. C. Porsiel,<sup>a</sup> R. Saadat<sup>a</sup> and G. Garnweitner<sup>\*ab</sup>

<sup>a</sup> Technische Universität Braunschweig, Institute for Particle Technology, Volkmaroder Straße 5, 38104 Braunschweig, Germany

<sup>b</sup> Technische Universität Braunschweig, Laboratory for Emerging Nanometrology, 38106 Braunschweig, Germany

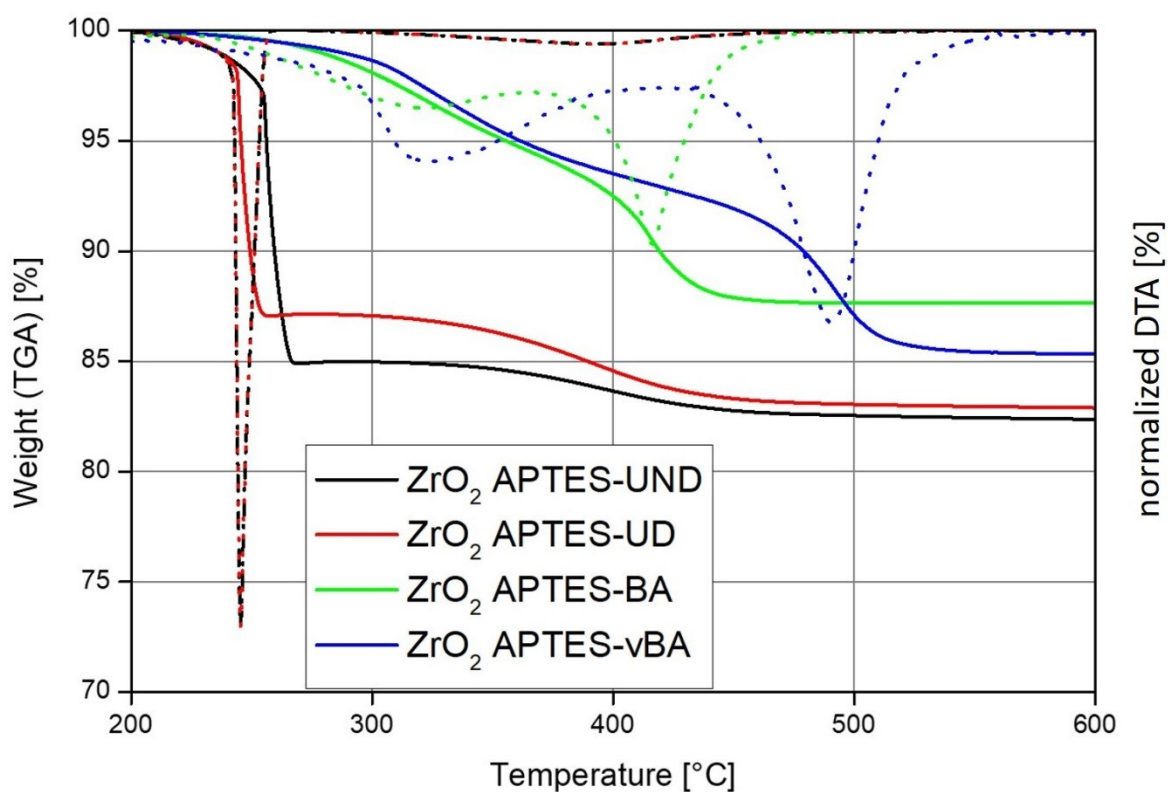

**Figure S1.** TGA and DTA curves of ZrO<sub>2</sub> nanoparticles modified with APTES and different carboxylic acids (supplement to Figure 7 in the main article).

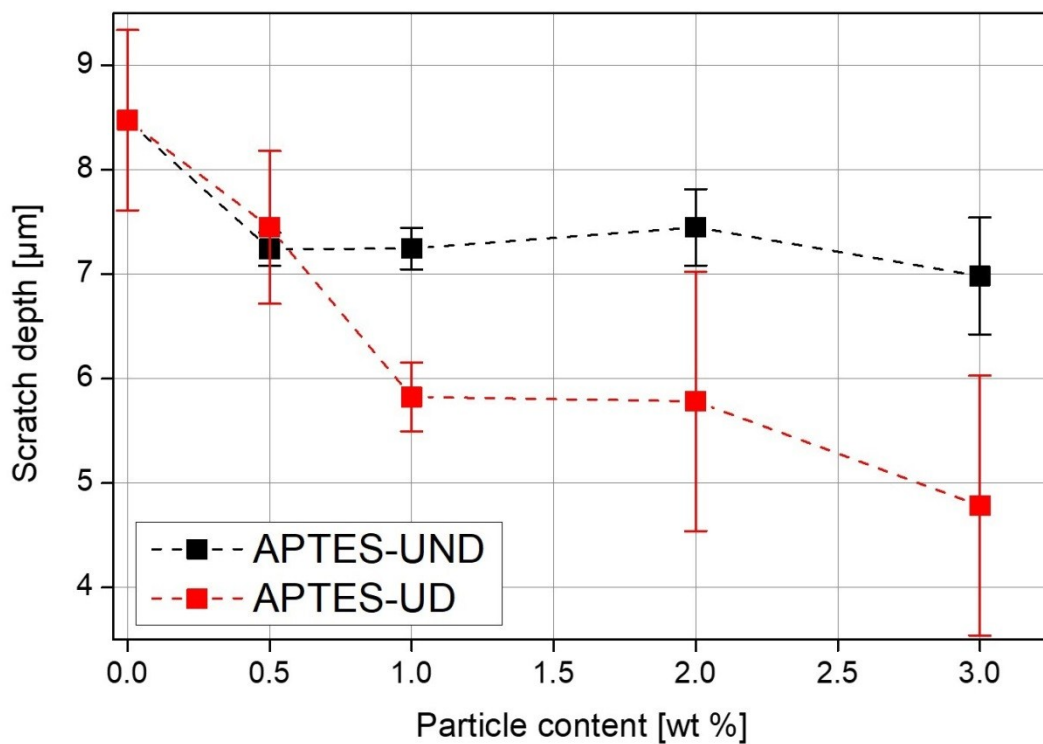

**Figure S2.** Scratch depth of NCs filled with different amounts of modified nanoparticles as indicated (supplement to Figure 12 in the main article).

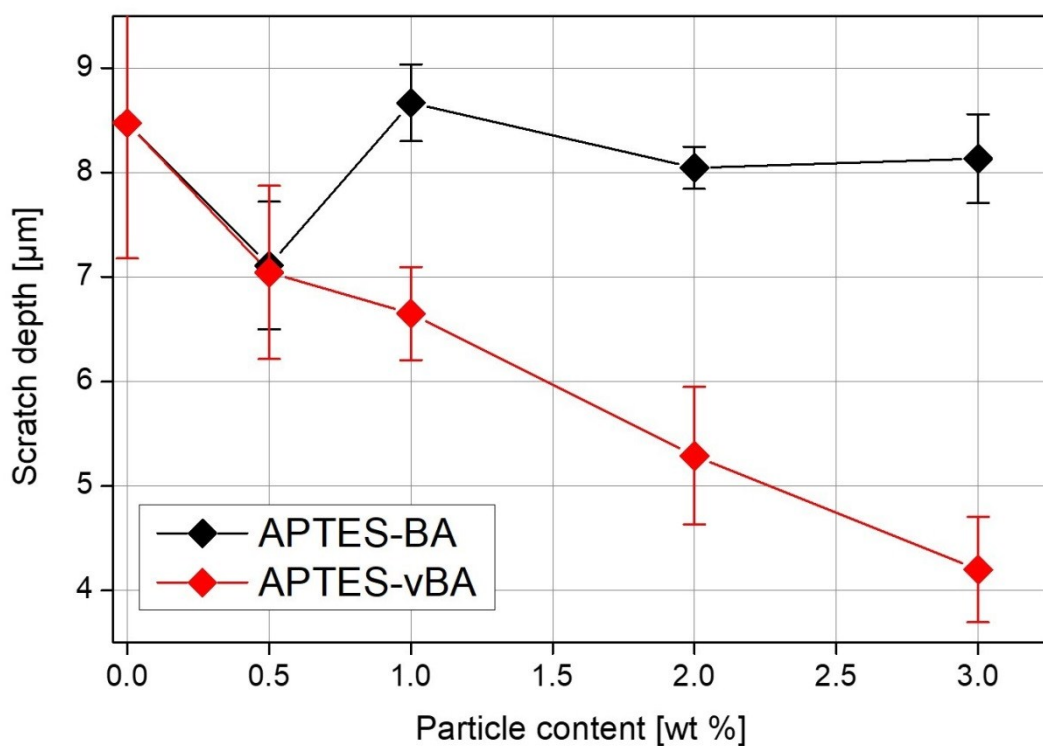

**Figure S3.** Scratch depth of NCs filled with different amounts of modified nanoparticles as indicated (supplement to Figure 12 in the main article).

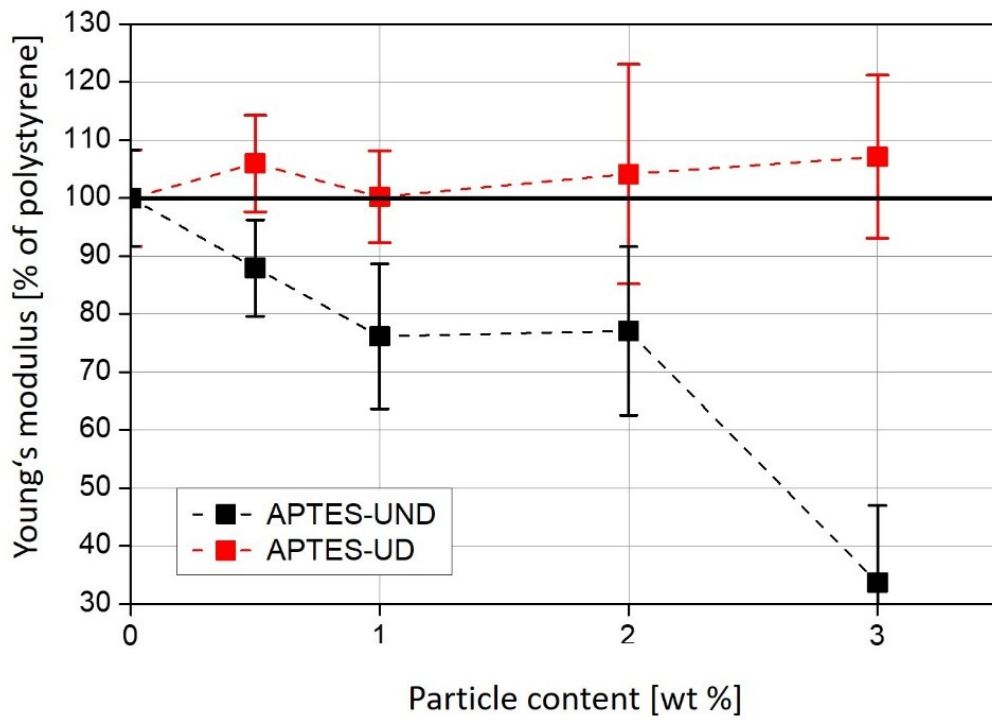

**Figure S4.** Young's modulus of NCs featuring the differently modified particles related to the measured modulus of pure PS (supplement to Figure 14 in the main article).

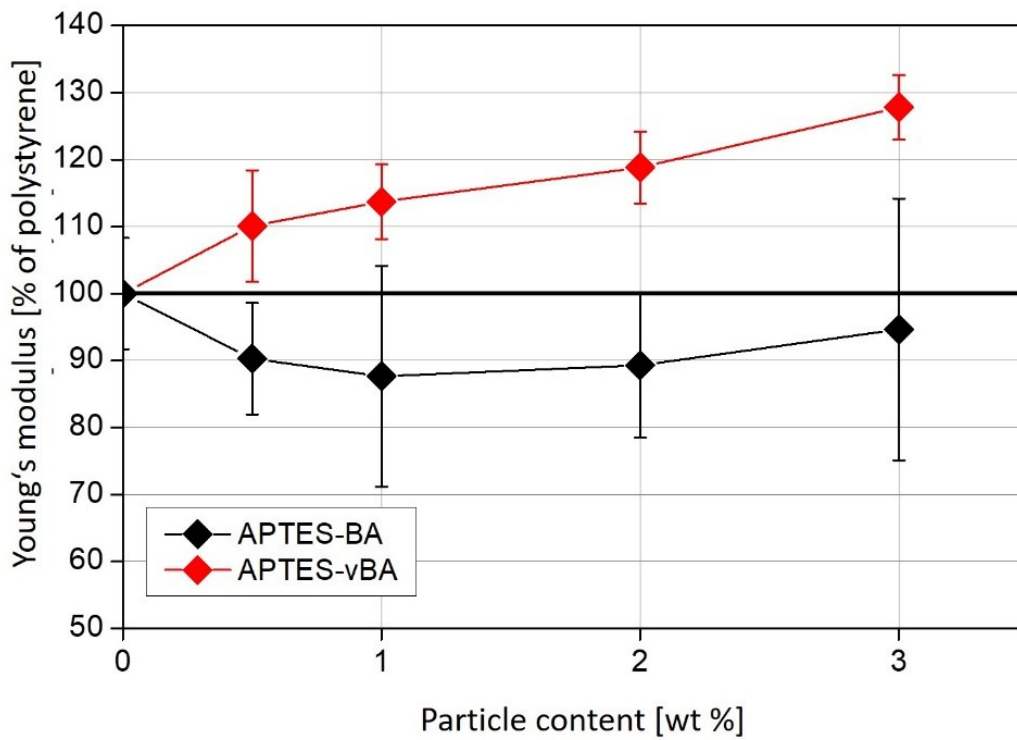

**Figure S5.** Young's modulus of NCs featuring the differently modified particles related to the measured modulus of pure PS (supplement to Figure 14 in the main article).
